# Supplementary material for: Conducting films based on single-component molecular metals
Source: Royal Society of Chemistry journal article supplement (doi:10.1039/c5cc05531h), 2015-01-01
Supplement: c5cc05531h1.pdf [file c5cc05531h1.pdf]

Supporting Information

Conducting films based on single-component molecular metals

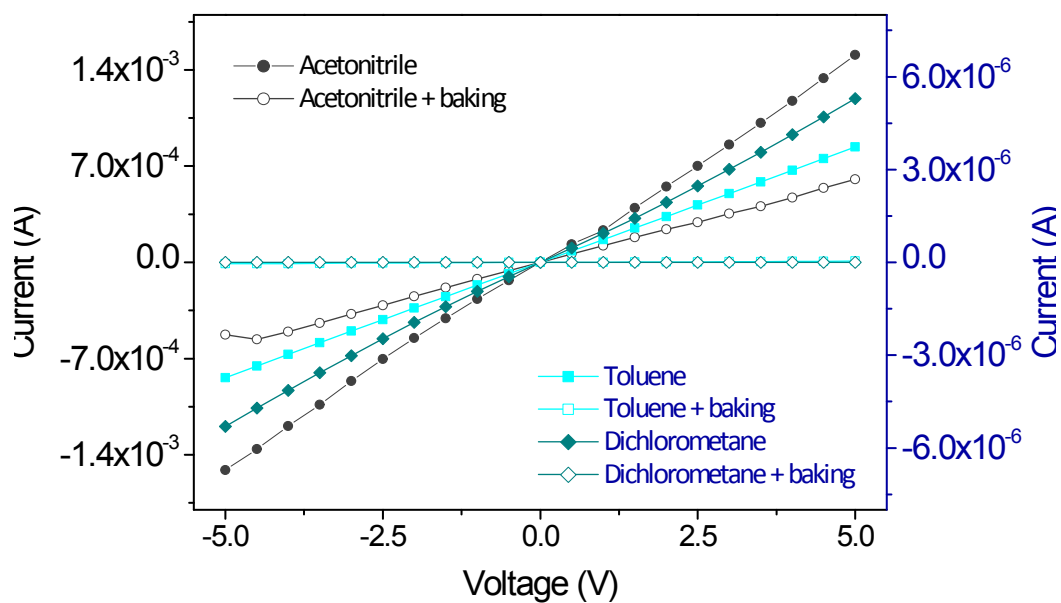

Fig. S1 *I-V* curves for unbaked and baked  $[\text{Au}(\alpha\text{-tpdt})_2]$  films prepared from different solvents.

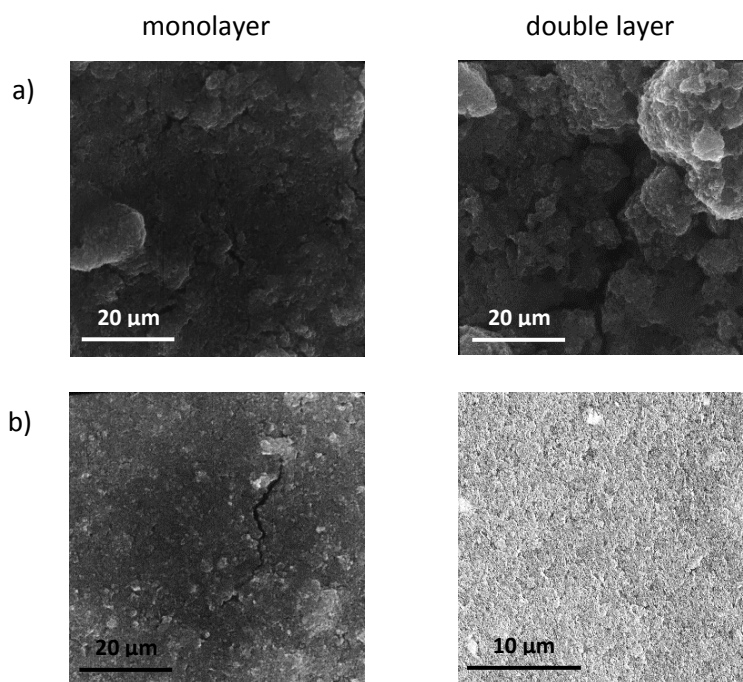

Fig. S2 SEM images of  $[\text{Au}(\alpha\text{-tpdt})_2]$  films prepared with: (a) acetonitrile, and (b) dichlorobenzene.

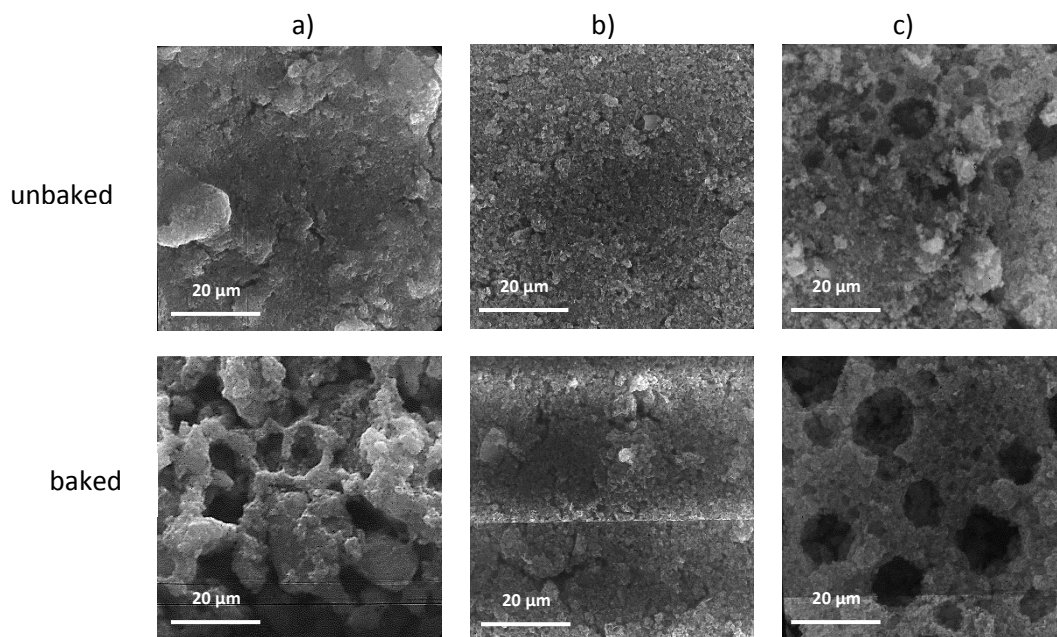

**Fig. S3** Effect of baking on  $[\text{Au}(\alpha\text{-tpdt})_2]$  films prepared from different solvents: (a) acetonitrile, (b) toluene, and (c) dichloromethane.

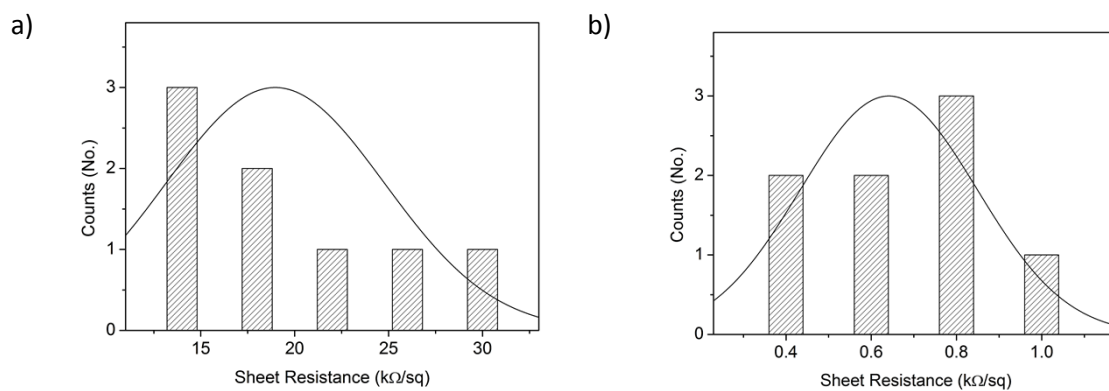

**Fig. S4** Histogram of sheet resistance values of: (a)  $[\text{Au}(\alpha\text{-tpdt})_2]$ , and (b)  $[\text{Ni}(\text{dttd})_2]$ .

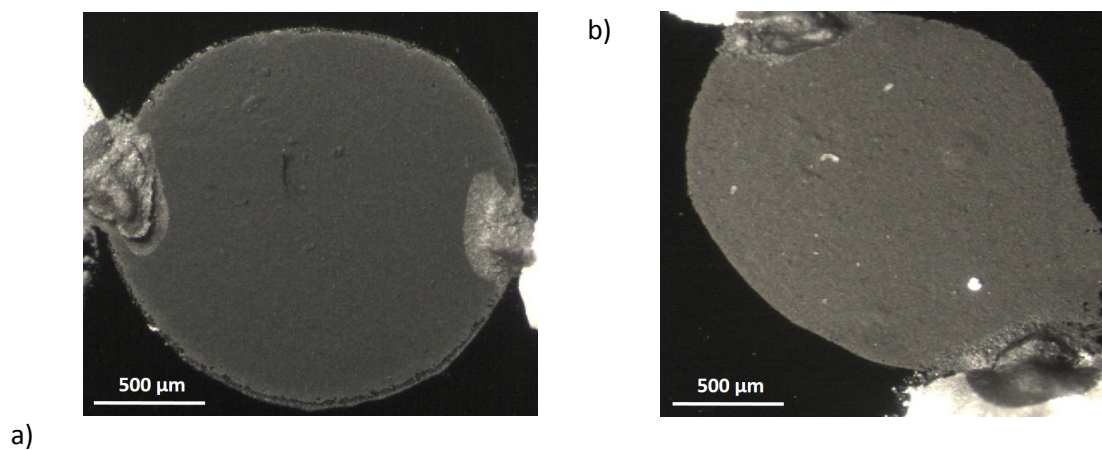

**Fig. S5** Optical images of: (a)  $[\text{Au}(\alpha\text{-tpdt})_2]$ , and (b)  $[\text{Ni}(\text{dttd})_2]$ .
